# Supplementary material for: SFCE-RAPIRI Phase I Study of Rapamycin Plus Irinotecan: A New Way to Target Intra-Tumor Hypoxia in Pediatric Refractory Cancers
Source: MDPI journal article supplement (doi:10.3390/cancers12103051), 2020-10-20
Supplement: s1 [file s1]

## Supplementary Materials

| Toxicity grades                 | Toxicity related to irinotecan and rapamycin      |         |           |          |                                                        |         |         |         |
|---------------------------------|---------------------------------------------------|---------|-----------|----------|--------------------------------------------------------|---------|---------|---------|
|                                 | Number of patients                                |         |           |          |                                                        |         |         |         |
|                                 | adverse events observed during Cycle 1 by patient |         |           |          | adverse events observed during other cycles by patient |         |         |         |
|                                 | Grade 1                                           | Grade 2 | Grade 3   | Grade 4  | Grade 1                                                | Grade 2 | Grade 3 | Grade 4 |
| <b>General toxicities</b>       |                                                   |         |           |          |                                                        |         |         |         |
| Anorexia                        | 5                                                 | 2       | 1 (DLT**) |          |                                                        |         | 1       |         |
| Weight loss                     | 2                                                 |         |           |          |                                                        |         | 1       |         |
| Denutrition                     |                                                   | 1       |           |          |                                                        |         |         |         |
| Fatigue                         | 5                                                 | 2       |           |          | 2                                                      | 2       | 1       |         |
| Headache                        |                                                   | 1       |           |          | 1                                                      |         |         |         |
| Pain                            |                                                   | 1       |           |          |                                                        |         |         |         |
| Alopecia                        | 1                                                 |         |           |          | 2                                                      | 1       |         |         |
| Skin rash                       |                                                   | 1       |           |          | 1                                                      | 1       |         |         |
| Skin dryness                    | 6                                                 |         |           |          | 1                                                      |         |         |         |
| Heat sensation                  | 1                                                 |         |           |          | 2                                                      |         |         |         |
| <b>GI/metabolic toxicities</b>  |                                                   |         |           |          |                                                        |         |         |         |
| Diarrhea                        | 7                                                 | 5       | 2 (DLT*§) |          | 4                                                      | 3       |         |         |
| Nausea                          | 5                                                 | 3       |           |          | 7                                                      | 1       |         |         |
| Vomiting                        | 10                                                | 4       | 3         |          | 8                                                      | 2       |         |         |
| Oral mucositis                  | 5                                                 | 3       | 1 (DLT**) |          | 7                                                      | 3       |         |         |
| Abdominal pain                  | 5                                                 | 4       |           |          | 3                                                      | 1       |         |         |
| Colitis                         |                                                   |         | 1         |          |                                                        |         |         |         |
| Pyrosis                         | 1                                                 |         |           |          | 1                                                      |         |         |         |
| Dehydration                     |                                                   | 1       |           |          |                                                        |         |         |         |
| Renal failure                   |                                                   |         |           |          | 1                                                      |         |         |         |
| Hypokaliemia                    | 1                                                 |         | 1         |          |                                                        |         |         |         |
| Hypophosphoremia                | 1                                                 |         | 1         |          |                                                        |         |         |         |
| Hypertriglyceridemia            | 1                                                 |         |           |          | 1                                                      |         |         |         |
| Hypoalbuminemia                 |                                                   | 1       |           |          |                                                        | 1       |         |         |
| ALP increase                    | 1                                                 |         | 1         |          | 1                                                      | 1       |         |         |
| <b>Hematological toxicities</b> |                                                   |         |           |          |                                                        |         |         |         |
| Thrombocytopenia                | 3                                                 |         | 1         |          | 2                                                      |         |         |         |
| Neutropenia                     | 2                                                 | 1       | 3         |          |                                                        |         | 2       |         |
| Lymphopenia                     | 1                                                 |         | 2         |          | 1                                                      |         |         |         |
| Anemia                          | 1                                                 | 1       |           |          |                                                        | 1       | 1       |         |
| Febrile neutropenia             |                                                   |         |           |          |                                                        |         |         |         |
| <b>Infections</b>               |                                                   |         |           |          |                                                        |         |         |         |
| Septic shock                    |                                                   |         |           | 1 (DLT*) |                                                        |         |         |         |
| <b>Others</b>                   |                                                   |         |           |          |                                                        |         |         |         |
| Hyperthermia                    |                                                   | 1       |           |          | 1                                                      |         |         |         |
| Dyspnea                         | 1                                                 |         |           |          |                                                        |         |         |         |
| Hyperpigmentation               | 1                                                 |         |           |          | 1                                                      |         |         |         |
| Conjunctivitis                  | 1                                                 |         |           |          |                                                        |         |         |         |
| Hiccough                        |                                                   | 1       |           |          |                                                        |         |         |         |
| Peripheral neuropathy           | 1                                                 |         |           |          | 2                                                      |         |         |         |
| Restless leg syndrome           |                                                   |         |           |          | 1                                                      |         |         |         |
| Total                           | 68                                                | 33      | 15        | 1        | 48                                                     | 17      | 8       | 0       |

\*one patient having both grade 3 and grade 4 events

\*\* one patient having 2 grade 3 events

§ one patient having grade 3 event

**Figure S1.** Listing of the different toxicities reported during first course and subsequent cycles.

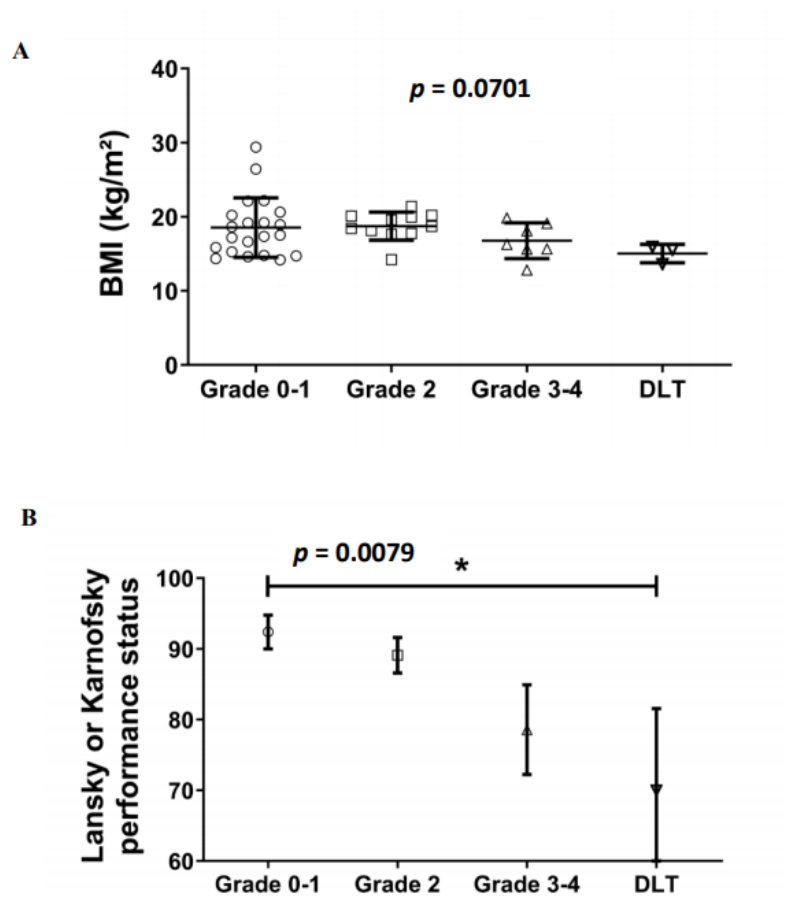

**Figure S2.** Complementary data on patient toxicity profile with A) Toxicity grades according to the body mass index (BMI) and B) Toxicity grades according to the Lansky or Karnofsky score.

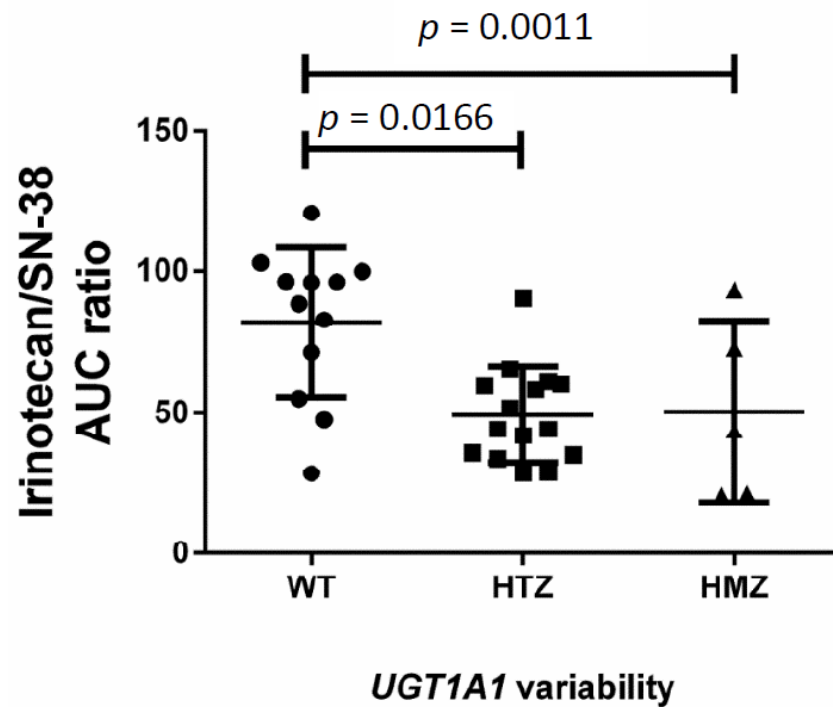

**Figure S3.** *UGT1A1* variability correlations showing significant correlation between the *UGT1A1* status and the ratio of irinotecan/SN-38 AUCs.

| Level | Patients evaluable for radiology | Tumor responses                 |
|-------|----------------------------------|---------------------------------|
| 1     | 3                                | 1 with SD, 2 with PDs           |
| 2     | 4                                | 4 with SDs                      |
| 3     | 3                                | 1 with PR, 2 with PDs           |
| 4     | 3                                | 3 with SDs                      |
| 5     | 2                                | 1 with SD, 1 with PD            |
| 6     | 3                                | 3 with PDs                      |
| 7     | 3                                | 3 with SDs                      |
| 8     | 3                                | 1 with PR, 1 with SD, 1 with PD |
| 9     | 4                                | 4 with SDs                      |
| 10    | 3                                | 1 with PDs, 2 with SDs          |

Abbreviations: PR=partial response; SD=stable disease; PD=progressive disease

**Figure S4.** Tumor responses per dose level in RAPIRI trial: 31 evaluable patients. No correlations were observed between tumor responses and dose levels ( $p=0.65$ ).

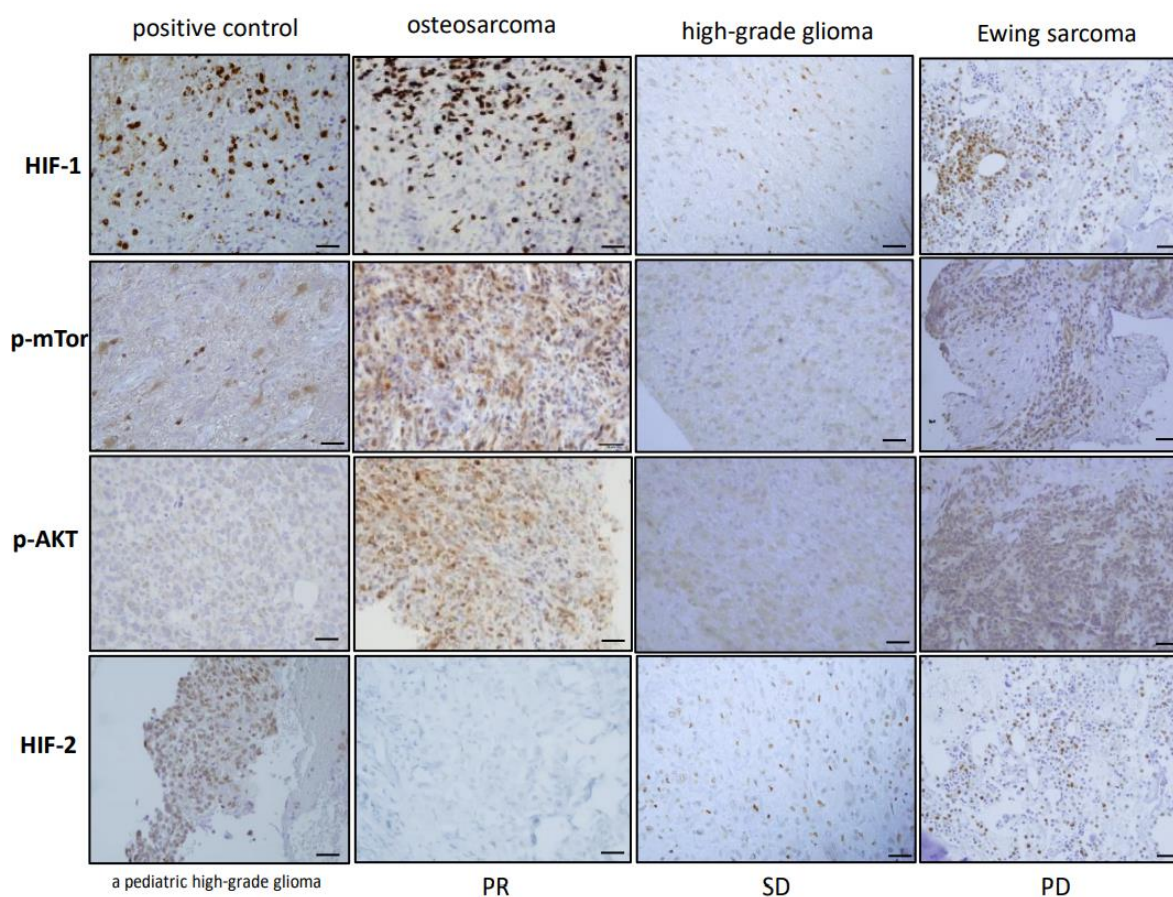

**Figure S5.** Immunohistochemical profiling analyses according to tumor responses. A positive control (a pediatric high-grade glioma) for all immunohistochemical staining is showed in first column of the figure. In other columns, an example of each response group is presented (scalebar = 20  $\mu$ m).

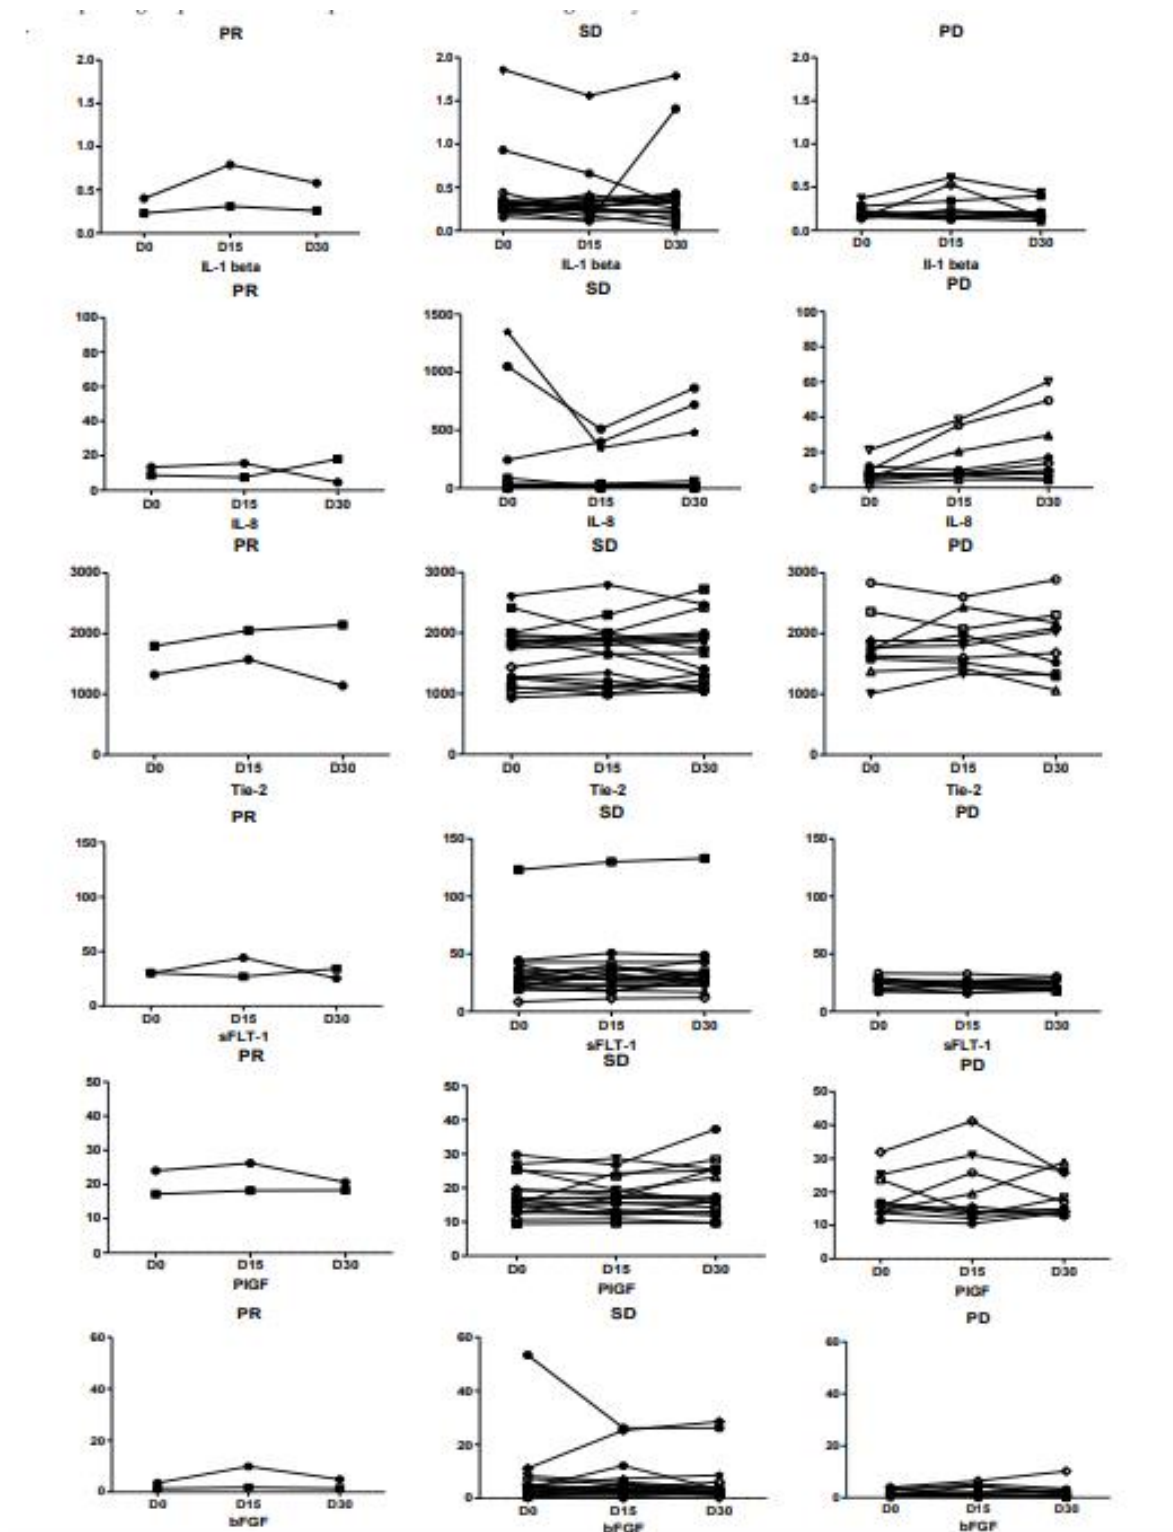

**Figure S6.** Cytokine evaluation according to response groups: partial response (PR), stable disease (SD) and progressive disease (PD). No statistical significance was observed for IL-1beta, IL-8, Tie-2, sFLT-1, PIGF and bFGF, where almost all response groups had the same plasmatic secretions during first cycle of treatment.
